# Supplementary material
Source: PubMed Central journal article supplement (PMC2669394)
Supplement: 0900155106_0900155106SI.pdf [file 0900155106_0900155106SI.pdf]

# Supporting Information

Mizuno et al. 10.1073/pnas.0900155106

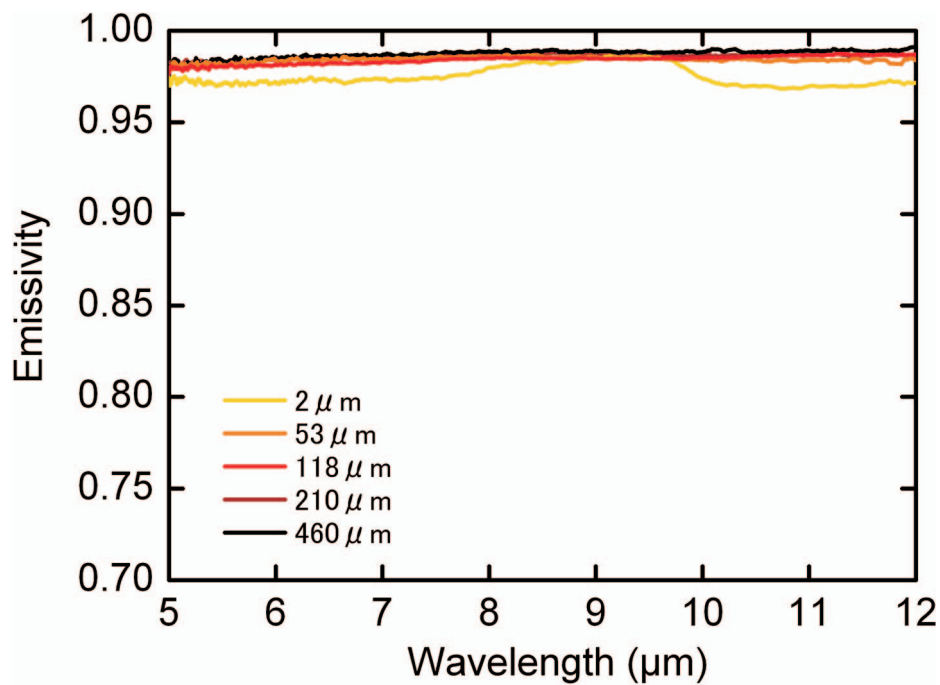

Fig. S1. Normal spectral emissivity of SWNT forests with different thickness.

**Table S1. Configuration and result of the 3 reflectance measurements**

|                            | UV-to-near IR              | Near-to-mid IR            | Mid-to-far IR   |
|----------------------------|----------------------------|---------------------------|-----------------|
| Wavelength, $\mu\text{m}$  | 0.2–2                      | 2–20                      | 25–200          |
| Apparatus                  |                            |                           |                 |
| Spectrometer               | Monochromator              | FT-IR                     | FT-IR           |
| Incident angle, $^{\circ}$ | 8                          | 5                         | 10              |
| Reflection                 | Hemispherical-directional  | Hemispherical-directional | Specular        |
| Detector                   | PMT, PbS                   | TGS, MCT                  | DLATGS          |
| Reference                  | White reflectance standard | Gold mirror               | Aluminum mirror |
| Result                     |                            |                           |                 |
| Average reflectance        | 0.0160                     | 0.0097                    | 0.0017          |
| Standard deviation         | 0.0048                     | 0.0041                    | 0.0027          |

Detectors are photomultiplier (PMT) and photoconductive lead sulfide (PbS) cell for the UV-near IR region, pyroelectric triglycine sulfate (TGS) and mercury-cadmium-telluride (MCT) for the near-mid IR, and pyroelectric deuterated L-alanine triglycine sulphate (DLATGS) for the mid-far IR.
